# Supplementary material
Source: publisher figshare collection journal article supplement (https://karger.figshare.com/ndownloader/files/36429009)
Supplement: Supplementary file 1 [file 36429009]

**Table S1: Primers and PCR cycling conditions used for HNA genotyping.**

| **HNA-system (Method)** | **Primers (5’ to 3’)** | **PCR Cycling conditions** |
| --- | --- | --- |
| **HNA-1 (Sequencing)** | F: 5’ GGGCCAAGATGCTCTAAGAC 3’  R: 5’ CAGTGGGACCACACATCATC 3’ | 95°C for 5 minutes; 35 cycles of 30 secs at 95°C, 30 secs at 63°C, 45 secs at 72°C; Final extension at 72°C for 10 mins |
| **HNA-3 (PCR-RFLP)** | F: 5′-GTAGACTGTCCTGAGAGCAC-3′  R: 5′-CTTGTAGGCGTGGATAGC-3′ | 95°C for 5 mins; 35 cycles of 30 secs at 95°C, 30 secs at 63°C, and 45 secs at 72°C; Final extension at 72°C for 10 mins followed by restriction digestion at 65°C with Taq(a)I |
| **HNA-4 (PCR-SSP)** | 4a F: 5′-TCATGCGAGCCCATCCG-3′  4b F: 5′-TCATGCGAGCCCATCCA-3′  R: 5′-ACAAGGAGGTCTGACGGTG-3′  IC F: 5’ TGCCTTCCCAACCATTCCCTTA 3’  IC R: 5’ CCACTCACGGATTTCTGTTGTGTTTC 3’ | 95°C for 10 mins; 10 cycles of 30 secs at 95°C, 40 secs at 64°C; 30 secs at 72°C; 20 cycles of 30 secs at 95°C, 40 secs at 61°C and 30 secs at 72°C; Final extension at 72 °C for 5 minutes |
| **HNA-5 (PCR-RFLP)** | F: 5’ CTTCAGCATCTCCACCTTGC 3’  R: 5’ TTCTGATATTCCCCACCCTGA 3’ | 95 °C for 10 mins; 13 cycles of touchdown PCR by 0.5C from 64°C; 25 cycles of 30 secs at 95 °C, 30 secs at 58 °C, 30 secs at 72°C; Final extension at 72°C for 5 mins followed by restriction digestion at 37°C with Bsp1286I |

**F: Forward Primer; R: Reverse Primer; IC: Internal Control**
